# Supplementary material
Source: PubMed Central journal article supplement (PMC3433782)
Supplement: emboj2012183s1.pdf [file emboj2012183s1.pdf]

## Supplementary Figure Legends

**Figure S1.** Tumor cells stimulate endothelial miRNAs. A. Verification of tumor-induced miRNAs by quantitative RT-PCR in brain endothelial cells co-cultured with SF539, colon endothelial cells co-cultured with HM7 and pancreas endothelial cells co-cultured with Panc1 for 24 hours. \*  $p < 0.05$ , Student's t-test. B. Induction of miRNAs in lung endothelial cells by a panel of NSCLC lines. C. Quantitative RT-PCR of miRNA expression in HUVECs co-cultured with different tumor cell lines. \*  $p < 0.05$ , Student's t-test.

**Figure S2.** Tumor conditioned media induces miRNAs. A. Quantitative RT-PCR of miRNA expression in endothelial cells stimulated with tumor conditioned medium for 24 hours. \*  $p < 0.05$ , Student's t-test. B. Effects of different angiogenic factors on endothelial miRNA expression. C. Tumor conditioned medium was concentrated with Amicon centrifugal filters as indicated. Both retentates and diffusates were tested for the ability to induce endothelial miRNAs. D. Quantitative PCR of miRNAs in skin endothelial cells co-cultured with SK23. Drosha, miR-9 or miR-183 was knocked down as indicated. \*  $p < 0.05$ , Student's t-test. E. Quantitative PCR of miRNAs in

SK23 MVs treated with RNase in combination with Proteinase K or 0.5% SDS. \*  $p < 0.05$ , Student's t-test. F. Quantitative PCR of miR-9 in SK23 cells, purified MVs or recipient HUVECs co-cultured with MVs. Transfection of anti-miR-9 in SK23 cells resulted in significant decrease of miR-9 expression. \*  $p < 0.05$ , Student's t-test.

**Figure S3.** Inhibition of tumor miR-9 decreases endothelial migration without affecting tumor cells. A. Trans-well migration of HUVECs in co-culture with scrambled or anti-miR-9 transfected SK23 cells. B. Effects of anti-miR-9 or siDrosha on tumor cell growth. C. Fifty-five angiogenesis-related proteins in purified SK23 MVs as detected by antibody array.

**Figure S4.** Anti-miR-9 inhibits angiogenesis and tumor growth in vivo. A. FITC-lectin perfusion assay in HM7 tumor xenografts. B. Quantification of tumor cell proliferation and apoptosis in HM7 tumors treated with scrambled sequence or anti-miR-9.

**Figure S5.** Tumor derived miRNAs activate the JAK-STAT pathway. A. Western blot of HUVECs transfected with individual miRNAs as indicated. B. Endothelial cell proliferation measured by BrdU ELISA. C. Cell

apoptosis in the presence of JAK2 inhibitors revealed by probing PARP and Caspase-3.

# Supplementary Figure 1

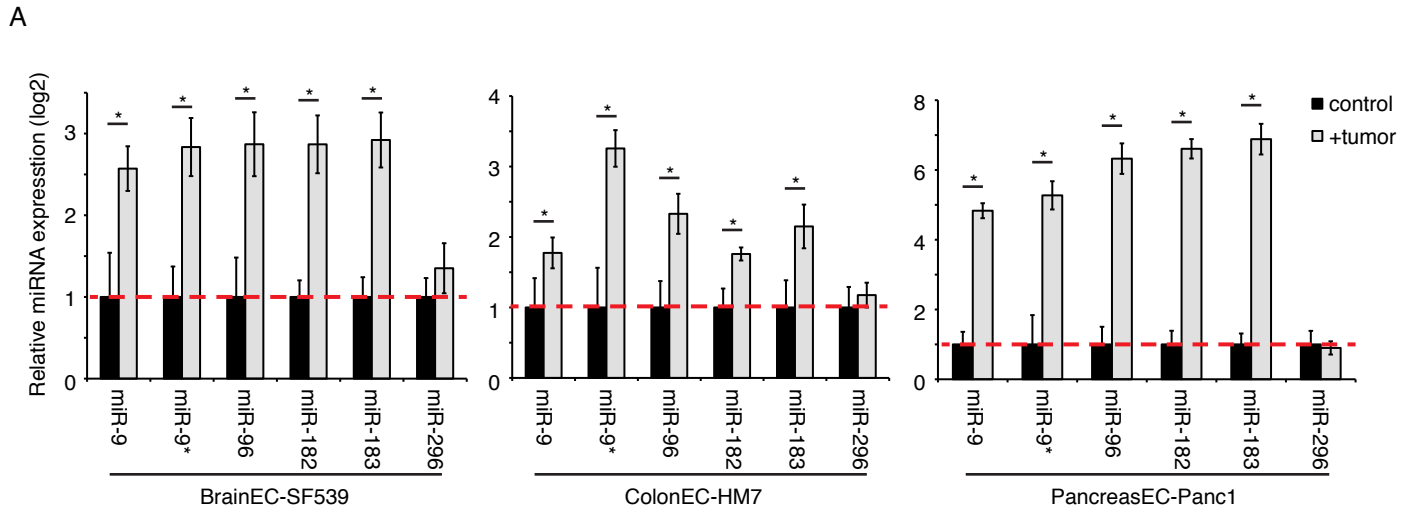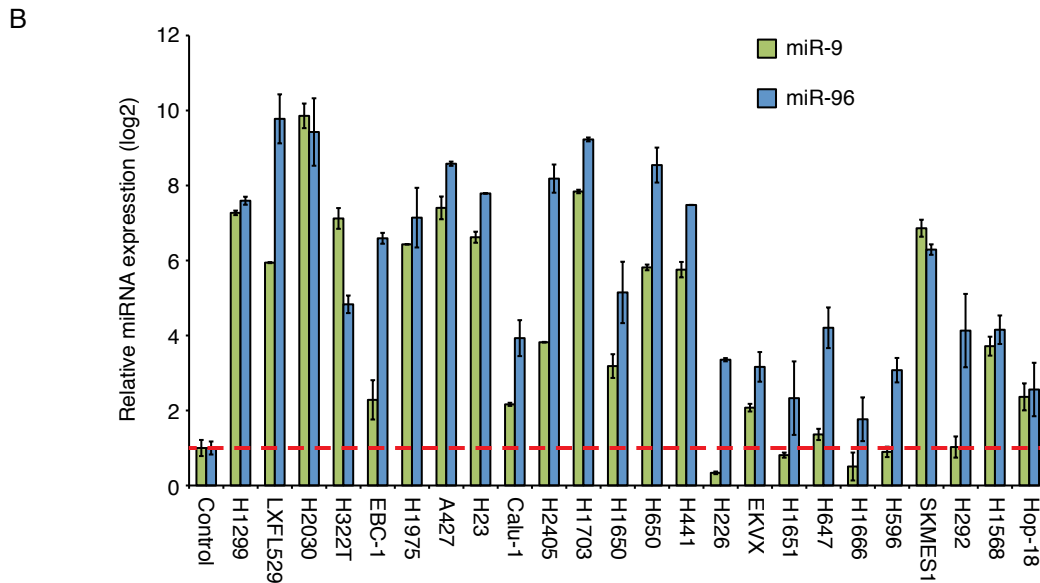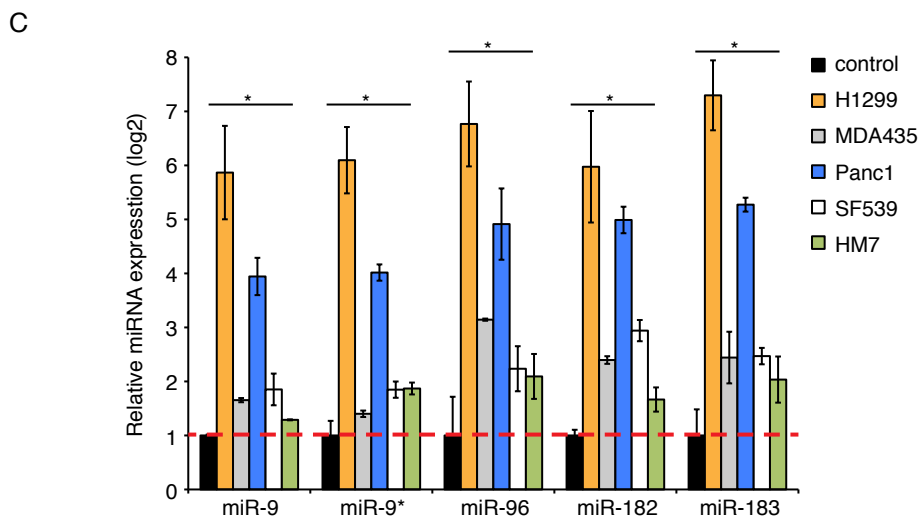

# Supplementary Figure 2

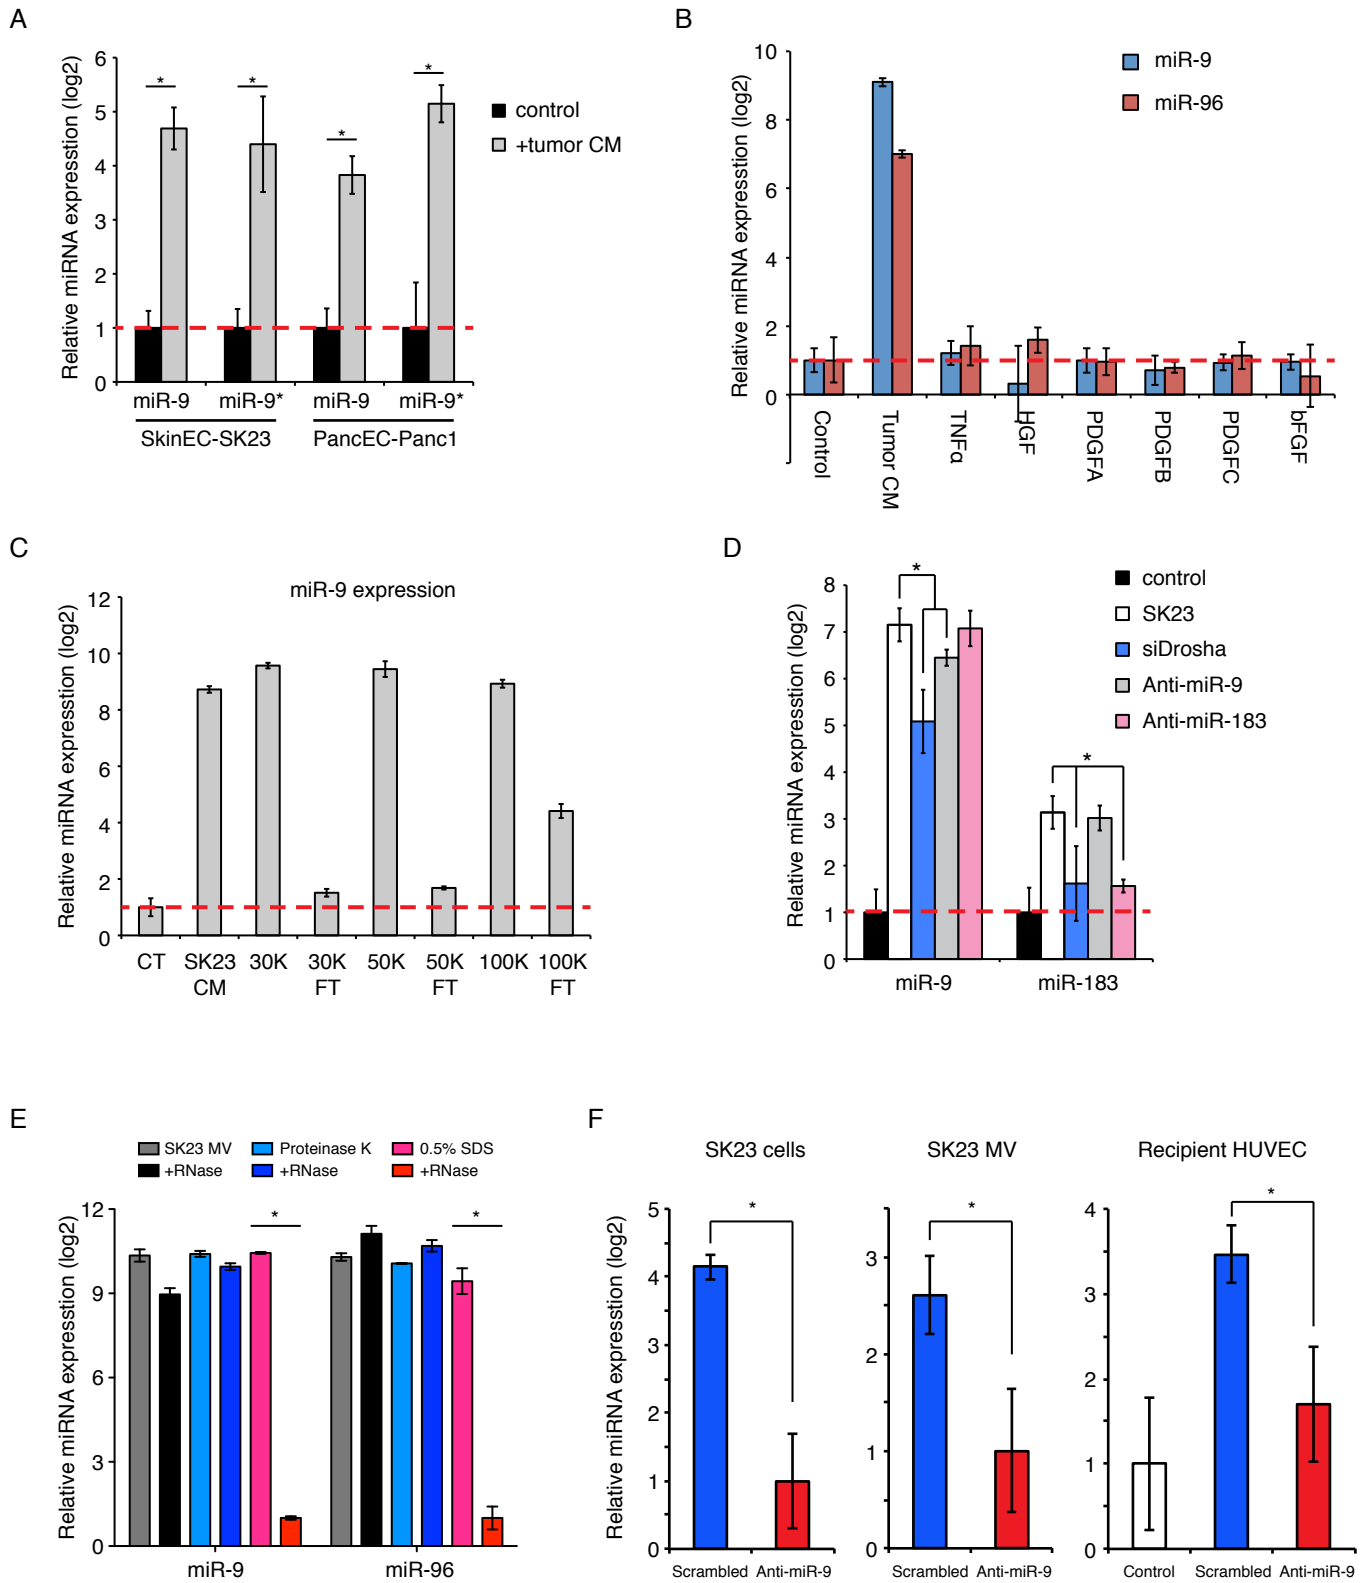

Supplementary Figure 3

A

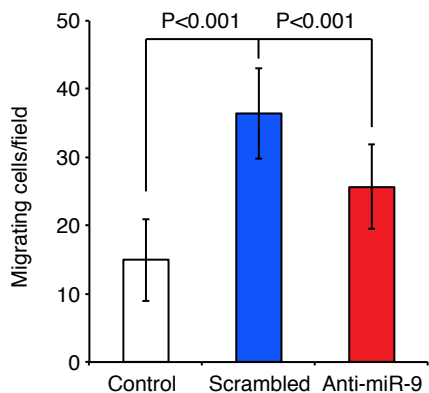

B

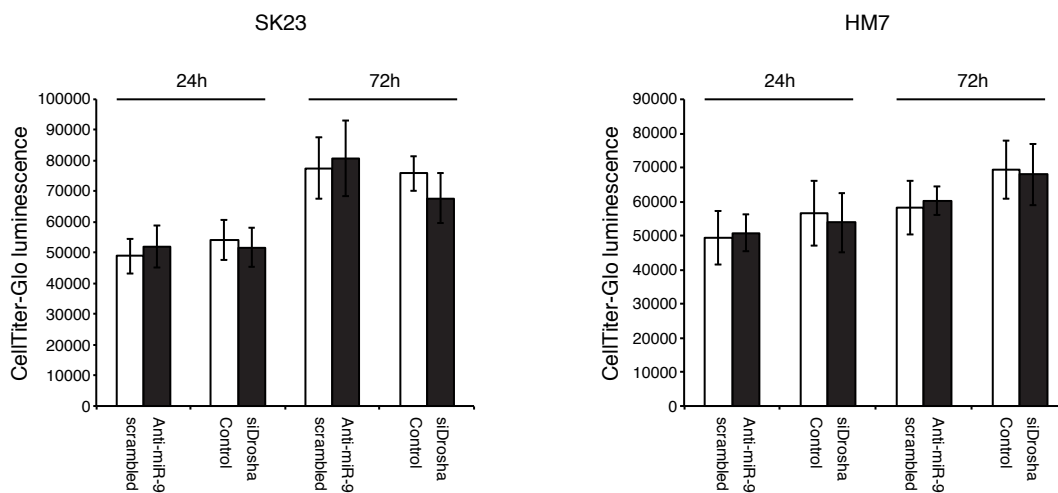

C

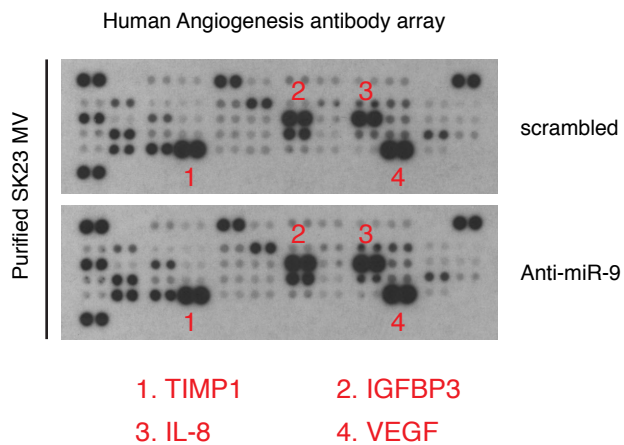

# Supplementary Figure 4

A

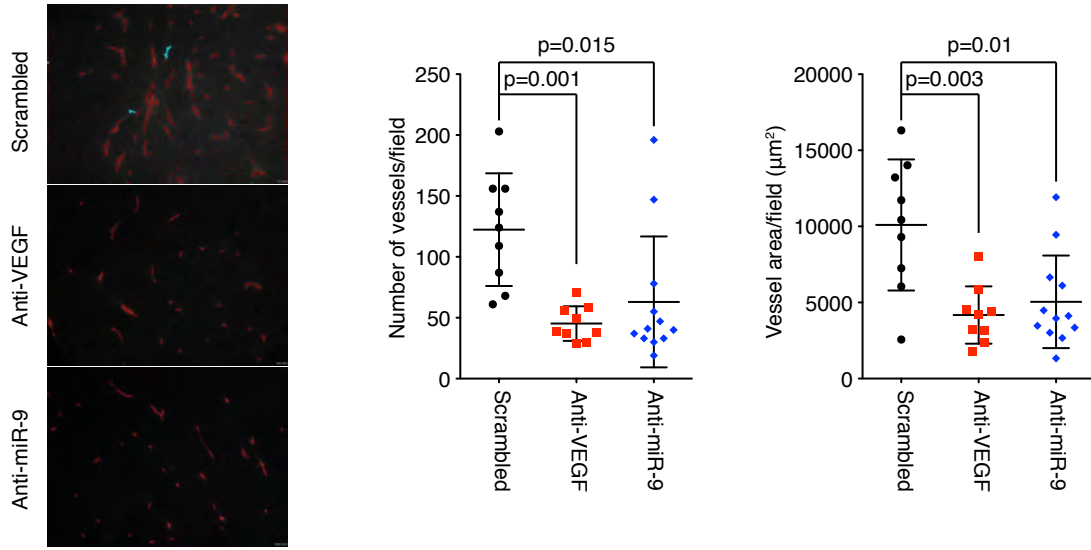

B

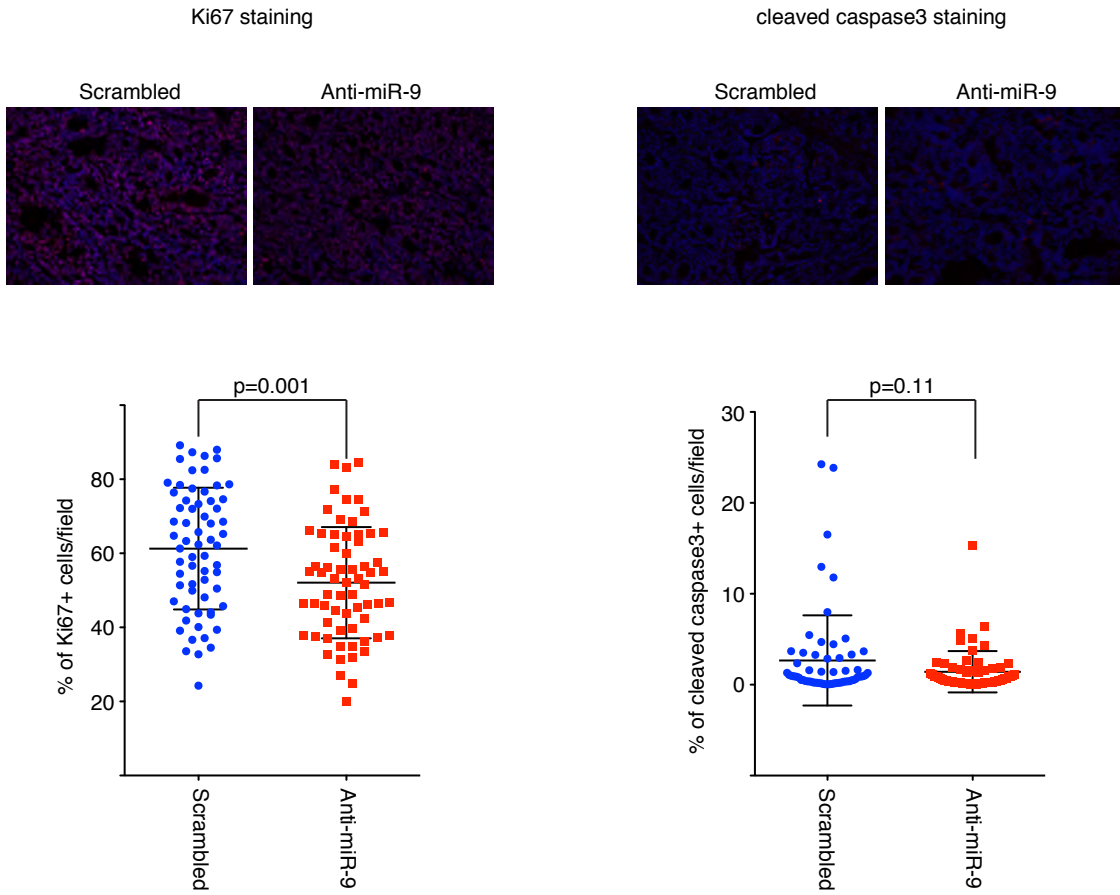

# Supplementary Figure 5

A

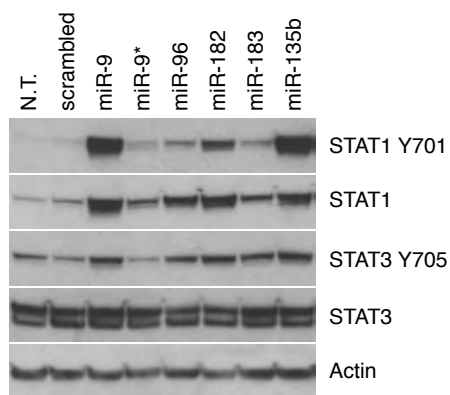

B

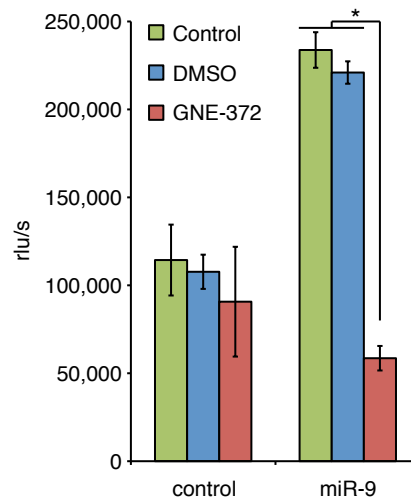

C

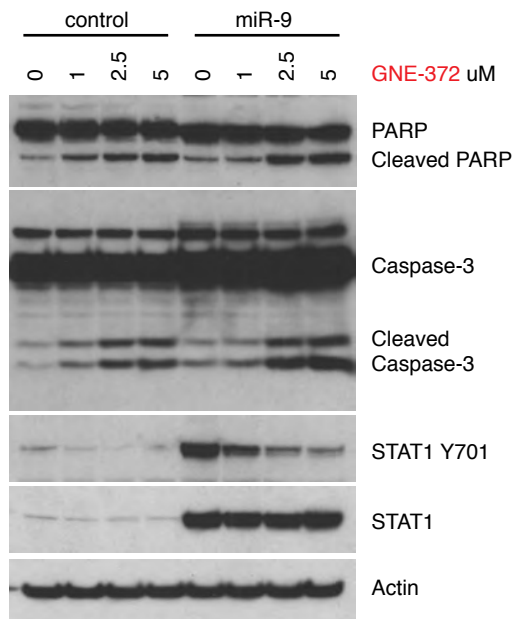



Supplementary Table 1. Differentially expressed miRNAs in endothelial cells in response to tumor cell stimulation.

| Lung-H1299      |             | Dermal-MDA435   |             | Pancreas-PANC1  |             | Brain-SF539    |              | Colon-HM7      |              |
|-----------------|-------------|-----------------|-------------|-----------------|-------------|----------------|--------------|----------------|--------------|
| miRNA           | fold (log2) | miRNA           | fold (log2) | miRNA           | fold (log2) | miRNA          | fold (log2)  | miRNA          | fold (log2)  |
| hsa-miR-9       | 5.272       | hsa-miR-9       | 3.023       | hsa-miR-9       | 2.77834375  | hsa-miR-9      | 2.458065037  | hsa-miR-9      | 1.751923562  |
| hsa-miR-10b     | 2.655       | hsa-miR-96      | 2.1822835   | hsa-miR-133a    | 2.095       | hsa-miR-98     | -2.207603451 | hsa-miR-18b    | -1.987416266 |
| hsa-miR-34c-5p  | 2.334       | hsa-miR-182     | 1.9232835   | hsa-miR-135b    | 4.704       | hsa-miR-135b   | 1.817350391  | hsa-miR-95     | -1.915581702 |
| hsa-miR-95      | 1.763       | hsa-miR-199a-5p | 2.744       | hsa-miR-182     | 2.31534375  | hsa-miR-138    | 1.567920688  | hsa-miR-135b   | 2.470189096  |
| hsa-miR-96      | 5.1703621   | hsa-miR-215     | 2.9762835   | hsa-miR-190     | -2.58920112 | hsa-miR-139-3p | 3.47654343   | hsa-miR-139-3p | -2.080485343 |
| hsa-miR-105     | 3.8833621   | hsa-miR-296-5p  | 1.669       | hsa-miR-302c    | -1.65920112 | hsa-miR-143    | 7.232872013  | hsa-miR-141    | 3.443840982  |
| hsa-miR-148a    | 1.624       | hsa-miR-363     | 7.275       | hsa-miR-375     | -2.204      | hsa-miR-145    | 4.682590488  | hsa-miR-148a   | -1.74972248  |
| hsa-miR-182     | 5.2483621   | hsa-miR-431     | -1.585      | hsa-miR-449b    | 1.899       | hsa-miR-223    | -2.015958782 | hsa-miR-187    | -2.047835349 |
| hsa-miR-183     | 4.8023621   | hsa-miR-451     | 2.386       | hsa-miR-616     | 2.016       | hsa-miR-329    | -1.760578152 | hsa-miR-200a   | 3.772259713  |
| hsa-miR-187     | -2.356382   | hsa-miR-504     | -1.531      | hsa-miR-618     | -1.793      | hsa-miR-541    | -2.088275906 | hsa-miR-200b   | 3.052783014  |
| hsa-miR-190     | 3.491       | hsa-miR-508-3p  | 4.9512835   | hsa-miR-642     | 2.56        | hsa-miR-582-3p | -1.606088635 | hsa-miR-200c   | 2.626645089  |
| hsa-miR-203     | 7.009       | hsa-miR-509-5p  | 2.5802835   | hsa-miR-206     | -1.768      | hsa-miR-708    | -2.183589932 | hsa-miR-203    | 2.357625009  |
| hsa-miR-210     | 3.469       | hsa-miR-642     | 2.8082835   | hsa-miR-380-5p  | -2.225      | hsa-miR-885-5p | 3.337379459  | hsa-miR-326    | -2.033232688 |
| hsa-miR-296-3p  | 4.0053621   | hsa-miR-651     | -1.9747716  | hsa-miR-497     | -1.757      | hsa-miR-659    | -2.666884424 | hsa-miR-429    | 3.069556237  |
| hsa-miR-296-5p  | 5.847       | hsa-miR-654-5p  | -4.0377716  | hsa-miR-500     | -1.683      | hsa-miR-374a*  | -2.081418039 | hsa-miR-487a   | -1.64428234  |
| hsa-miR-302b    | 1.8203621   | hsa-miR-506     | 2.1282835   | hsa-miR-488     | -1.938      | hsa-miR-7-2*   | 1.69789028   | hsa-miR-518f   | -5.901333808 |
| hsa-miR-449a    | 3.7063621   | hsa-miR-206     | -1.826      | hsa-miR-516-3p  | -2.812      | hsa-miR-374b*  | -1.530123712 | hsa-miR-541    | -4.904393195 |
| hsa-miR-449b    | 4.5563621   | hsa-miR-769-3p  | -1.7        | hsa-miR-564     | -5.45972    | hsa-miR-1226*  | -1.507002832 | hsa-miR-206    | 2.601670264  |
| hsa-miR-451     | 1.5353621   | hsa-miR-9*      | 2.487       | hsa-miR-601     | -2.88572    | hsa-miR-1269   | 5.205857276  | hsa-miR-622    | -1.79489422  |
| hsa-miR-483-5p  | 2.321       | hsa-miR-193b*   | 1.591       | hsa-miR-605     | -3.64772    | hsa-miR-1255B  | 1.511204718  | hsa-miR-638    | 4.80663204   |
| hsa-miR-493     | 1.857       | hsa-let-7c*     | 2.70962875  | hsa-miR-638     | -1.807      | hsa-miR-1183   | -1.549248697 | hsa-miR-572    | 1.540444373  |
| hsa-miR-551b    | 3.4033621   | hsa-miR-577     | 4.10662875  | hsa-miR-645     | -1.85       | hsa-miR-1289   | -1.605137445 | hsa-miR-580    | 4.197224615  |
| hsa-miR-642     | 4.8713621   | hsa-miR-1225-3P | -6.41231525 | hsa-miR-573     | -2.965      | hsa-miR-1300   | 1.773884772  | hsa-miR-770-5p | -1.614720346 |
| hsa-miR-885-5p  | 2.122       | hsa-miR-1269    | 1.77562875  | hsa-miR-29c*    | -1.512      |                |              | hsa-miR-939    | 2.558663367  |
| hsa-miR-30d     | 1.511       | hsa-miR-1183    | -4.00631525 | hsa-miR-769-3p  | -1.628      |                |              | hsa-miR-26a-1* | -1.555420877 |
| hsa-miR-34b     | 2.4714285   |                 |             | hsa-miR-221*    | -1.525      |                |              | hsa-miR-191*   | -2.05805874  |
| hsa-miR-500     | 2.9094285   |                 |             | hsa-miR-26a-2*  | -1.94       |                |              | hsa-miR-1305   | 2.299860953  |
| hsa-miR-592     | 6.151       |                 |             | hsa-miR-374a*   | -1.796      |                |              | hsa-miR-1275   | 1.701766013  |
| hsa-miR-641     | 1.7504285   |                 |             | hsa-miR-377*    | -1.86172    |                |              | hsa-miR-1243   | -2.539521219 |
| hsa-miR-572     | 1.61        |                 |             | hsa-miR-125b-2* | -4.21572    |                |              | hsa-miR-1248   | 2.366608618  |
| hsa-miR-34b     | 1.614       |                 |             | hsa-let-7i*     | -1.988      |                |              |                |              |
| hsa-miR-93*     | 1.547       |                 |             | hsa-miR-9*      | 3.818152    |                |              |                |              |
| hsa-miR-100*    | 2.242       |                 |             | hsa-miR-192*    | -2.241      |                |              |                |              |
| hsa-miR-27b*    | 1.532       |                 |             | hsa-miR-30d*    | -2.083      |                |              |                |              |
| hsa-miR-935     | 1.717       |                 |             | hsa-let-7a*     | -1.54472    |                |              |                |              |
| hsa-miR-875-5p  | 1.898       |                 |             | hsa-miR-744*    | -1.695      |                |              |                |              |
| hsa-miR-9*      | 7.636       |                 |             | hsa-miR-125b-1* | -1.581      |                |              |                |              |
| hsa-miR-183*    | 7.5534285   |                 |             | hsa-miR-106b*   | -2.108      |                |              |                |              |
| hsa-miR-155*    | 1.862       |                 |             | hsa-let-7c*     | -1.736      |                |              |                |              |
| hsa-miR-218-2*  | -2.123685   |                 |             | hsa-let-7f-1*   | -2.81472    |                |              |                |              |
| hsa-miR-425*    | 2.33        |                 |             | hsa-let-7f-2*   | -1.794      |                |              |                |              |
| hsa-miR-10b*    | 1.758       |                 |             | hsa-miR-23a*    | 1.747152    |                |              |                |              |
| hsa-miR-483-3p  | 7.8934285   |                 |             | hsa-miR-338-5P  | -2.488      |                |              |                |              |
| hsa-miR-125b-1* | 2.007       |                 |             | hsa-miR-1225-3P | -7.79272    |                |              |                |              |
| hsa-miR-106b*   | 2.648       |                 |             | hsa-miR-1233    | -2.142      |                |              |                |              |
| hsa-miR-577     | 7.3014285   |                 |             | hsa-miR-1179    | -2.62272    |                |              |                |              |
| hsa-miR-191*    | 2.786       |                 |             | hsa-miR-1255B   | -2.822      |                |              |                |              |
| hsa-miR-1226*   | 3.381       |                 |             | hsa-miR-1282    | -2.279      |                |              |                |              |
| hsa-miR-1303    | 4.6444285   |                 |             | hsa-miR-1197    | -2.513      |                |              |                |              |
| hsa-miR-1183    | 3.0434285   |                 |             | hsa-miR-1275    | -1.587      |                |              |                |              |
| hsa-miR-1262    | 2.17        |                 |             | hsa-miR-1183    | -5.23772    |                |              |                |              |
|                 |             |                 |             | hsa-miR-1276    | -1.927      |                |              |                |              |
|                 |             |                 |             | hsa-miR-320B    | -1.577      |                |              |                |              |
|                 |             |                 |             | hsa-miR-1256    | 2.101       |                |              |                |              |
|                 |             |                 |             | hsa-miR-1262    | -3.057      |                |              |                |              |
|                 |             |                 |             | hsa-miR-1248    | -2.166      |                |              |                |              |
