# Supplementary material
Source: PubMed Central journal article supplement (PMC3433782)

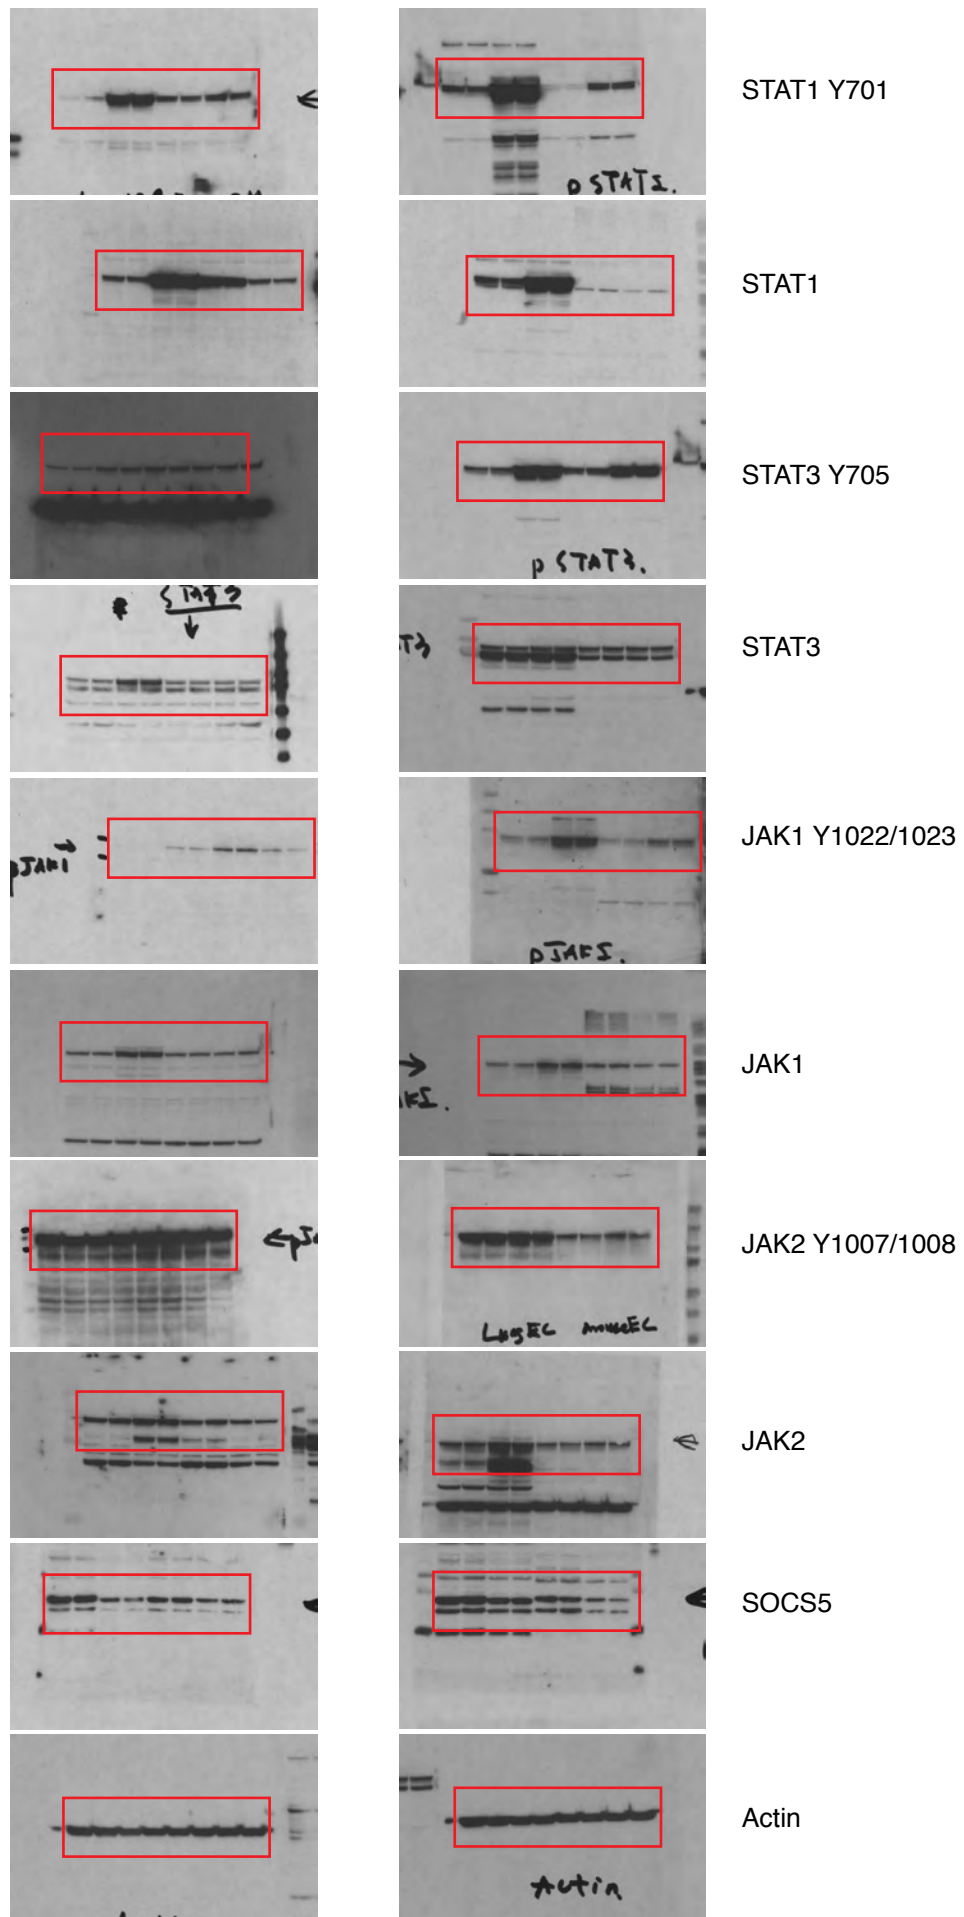

Supplement: emboj2012183s2.pdf [file emboj2012183s2.pdf]

Figure 6A

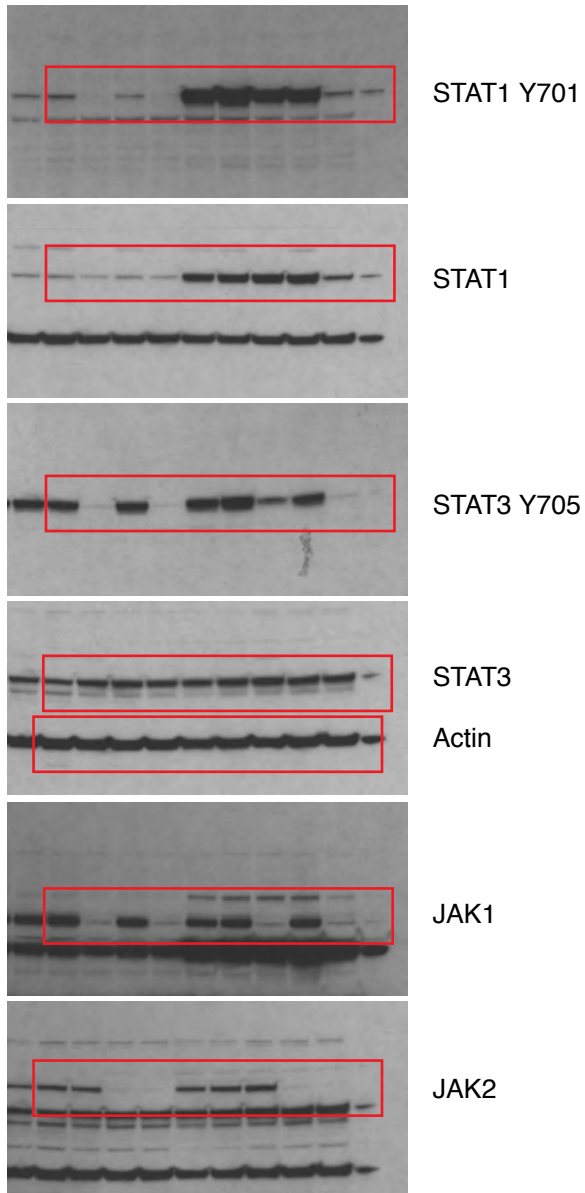

Figure 6C

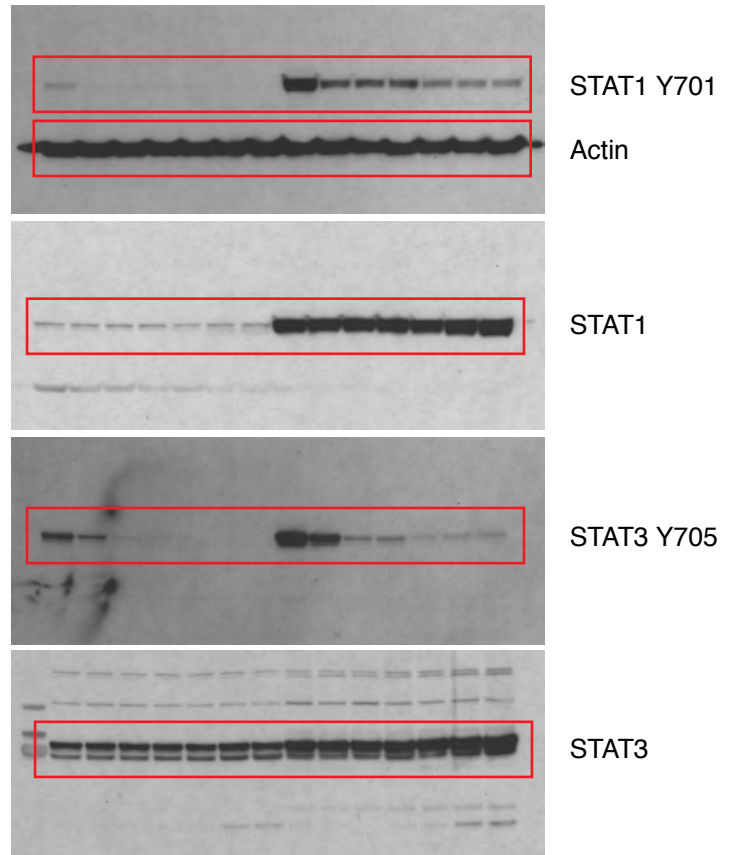

Supplement: emboj2012183s3.pdf [file emboj2012183s3.pdf]
